# Supplementary material for: Large-Scale Survey of Intraspecific Fitness and Cell Morphology Variation in a Protoploid Yeast Species
Source: PubMed Central journal article supplement (PMC4825641; doi:10.1534/g3.115.026682), 2016-02-16
Supplement: supp_g3.115.026682_026682SM.pdf [file supp_g3.115.026682_026682SM.pdf]

# Supporting Materials

## Large-scale survey of the intraspecific fitness and cell morphology variation in a protoploid yeast species

Paul P. Jung, Anastasie Sigwalt, Shinsuke Ohnuki, Jacky de Montigny, Yoshikazu Ohya, and Joseph Schacherer

### Supporting Figures

**Figure S1. Cumulative proportion of variance of the principal component analysis for the phenotypes.** Grey bars indicate the proportion of variance (left axis) explained by the PCs. Red circles indicate the cumulative proportion of variance (right axis) explained by the PCs. The horizontal dashed red line indicates 60% and 90% of the cumulative proportion of variance.

**Figure S2. Relationships between specific growth rate, lag phase and yield of biomass.** The fitness parameters were extracted from high-density growth curves. A high correlation is found when comparing growth rates and yield of biomass (A) whereas the lag phase feature do not correlate with neither yield of biomass (B) nor growth rates (C).

**Figure S3. Trait variation with *L. kluyveri* according to the environmental condition classes.** Hierarchical clustering of trait profiles was performed using a centered Pearson correlation metric and average linkage mapping for carbon sources, toxins and environment and metabolites classes. The color scale represents results where high growth rates are depicted in red and slow growth rates in blue.

**Figure S4. Pair plots of PC scores for the 27 *L. kluyveri* species.** Principal component analysis of *L. kluyveri* morphological variation. Strains are represented by their coordinates along the first five principal components. Box colors represent geographical origins as red with America, purple with Europe, and orange with Asia, using the same colors as in Figure 2B.

## **Supporting Tables**

**Table S1.** List of strains used in this study.

**Table S2.** List of tested conditions.

**Table S3.** Principal component loadings used for the characterization of each PC.

**Figure S1**

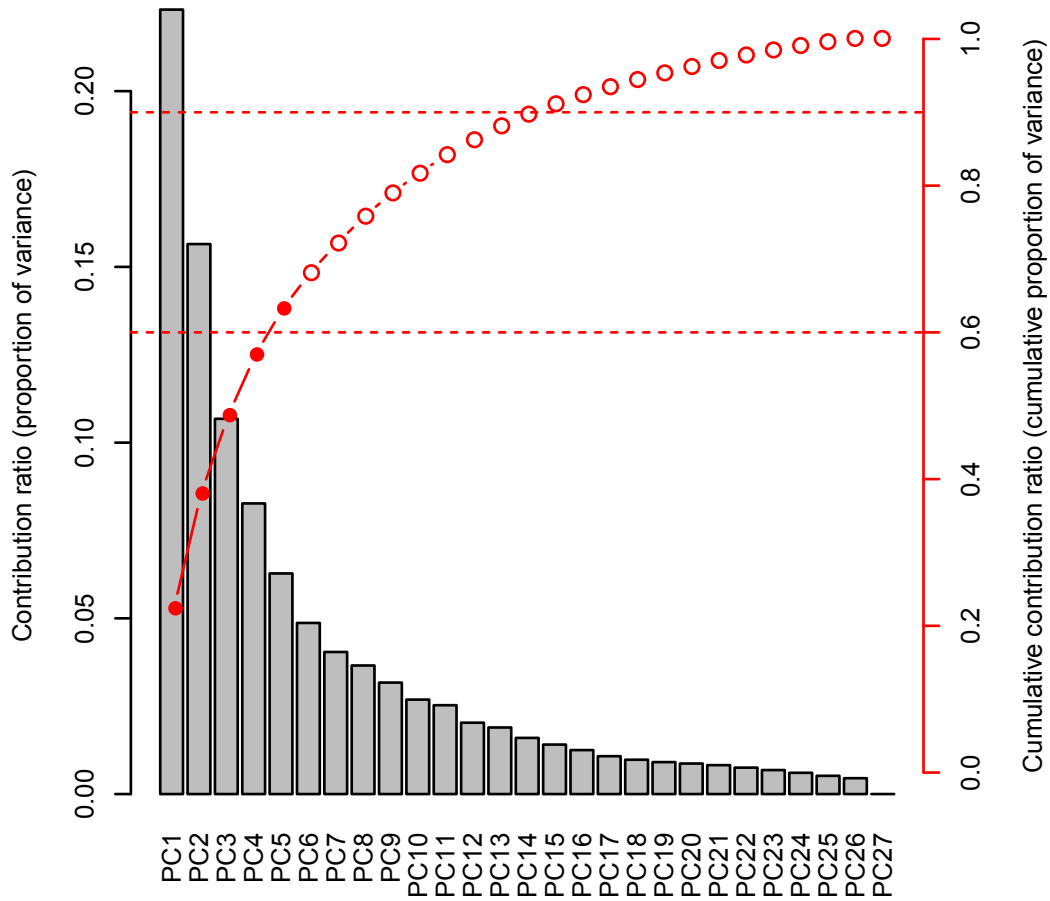

Figure S2

**A**

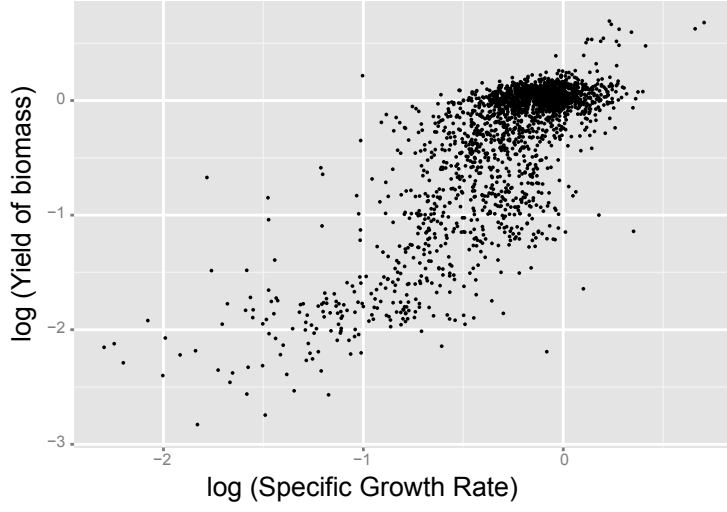

**B**

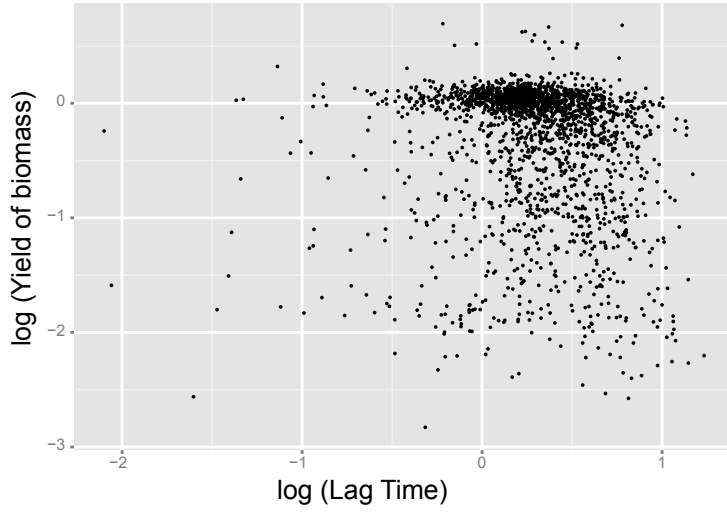

**C**

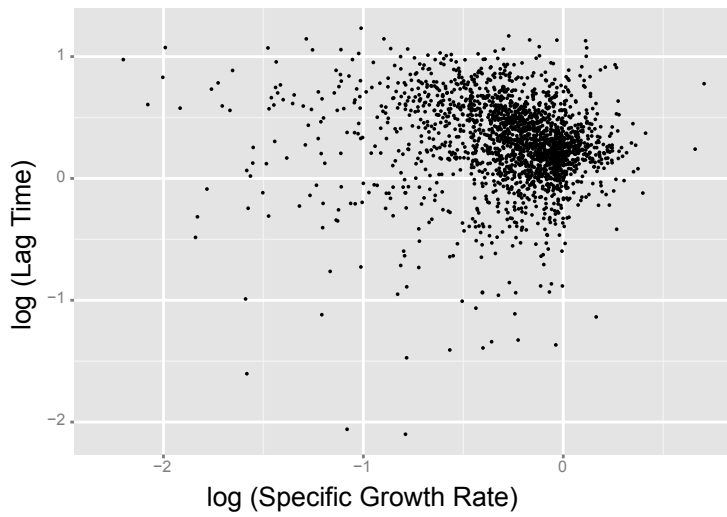

Figure S3

### Carbon sources

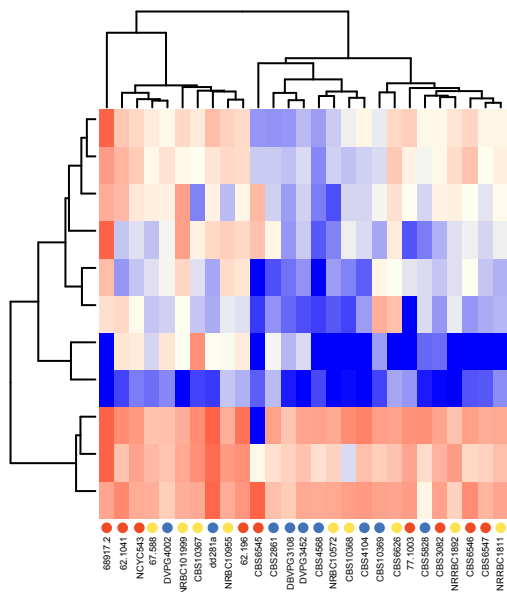

### Environment and Metabolites

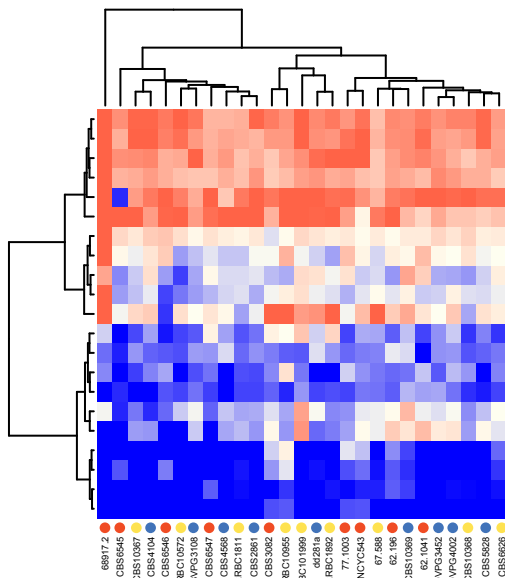

### Toxins

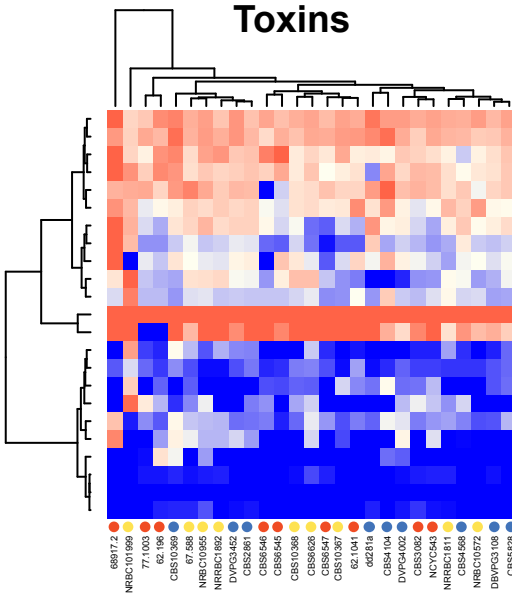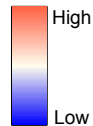

Figure S4

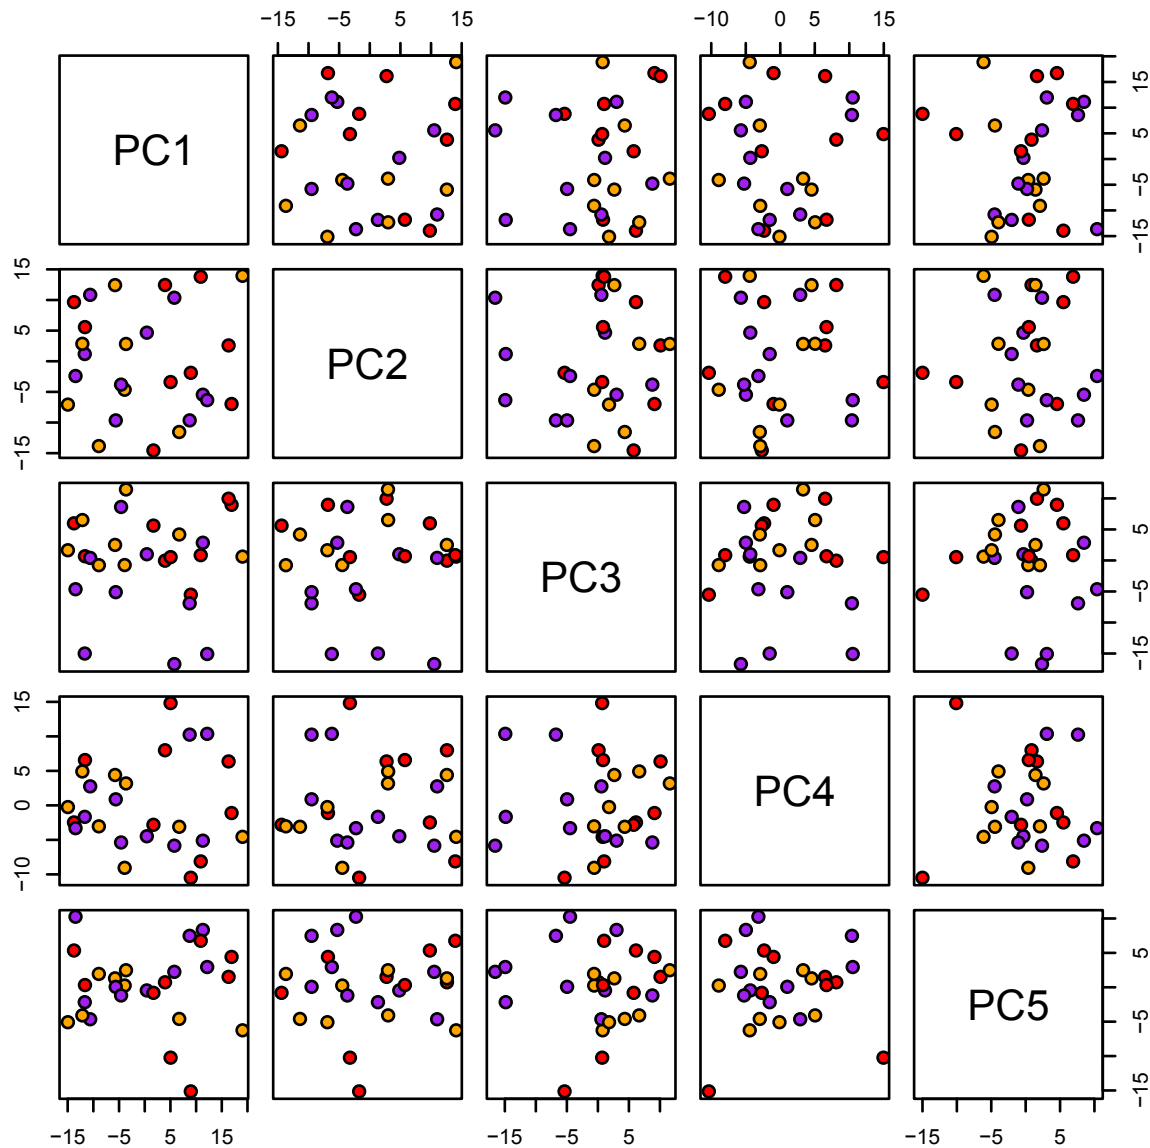

**Table S1.** Strains used in this study

| <b>Strain</b>      | <b>Ecological niches</b>                     | <b>Geographical origins</b>            |
|--------------------|----------------------------------------------|----------------------------------------|
| <b>62-1041</b>     | Willow exudate                               | USA, California, Davis                 |
| <b>CBS 3082</b>    | <i>Drosophila pinicola</i>                   | USA, California                        |
| <b>77-1003</b>     | Unknown                                      | USA, California                        |
| <b>NCYC 543</b>    | <i>Drosophila pinicola</i>                   | USA, California                        |
| <b>62-196</b>      | <i>Taraxacum officinale</i>                  | Canada, Saskatoon                      |
| <b>CBS 6545</b>    | Salix exudate                                | USA, California                        |
| <b>CBS 6546</b>    | Exudate of Populus sp.                       | USA, California                        |
| <b>CBS 6547</b>    | <i>Drosophila pseudobscura</i>               | USA, California, Gualala Creek         |
| <b>CBS 6626</b>    | Exudate of tree                              | Japan, Mt. Takamatsu                   |
| <b>NRBC 1892</b>   | Tree exudate                                 | Japan                                  |
| <b>CBS 10367</b>   | <i>Quercus Mongolica</i> exudate             | Russia, Kedrova pas natural reserve    |
| <b>CBS 10368</b>   | <i>Quercus Mongolica</i> exudate             | Russia, Sikhote-Alinsky nature reserve |
| <b>CBS 4104</b>    | Soil                                         | Netherlands, Wageningen                |
| <b>68.917-2</b>    | Exudate of Populus trichocarpa               | Canada                                 |
| <b>DBVPG 4002</b>  | Cavern                                       | Italy                                  |
| <b>67-588</b>      | <i>Ulmus japonica</i> exudate                | Japan, Yamabe                          |
| <b>NRBC 1811</b>   | Partially decaying leaf                      | Japan                                  |
| <b>NRBC 10572</b>  | Moss                                         | Thailand                               |
| <b>NRBC 10955</b>  | Decaying leaf of <i>Rhizophora mucronata</i> | Japan                                  |
| <b>CBS 10369</b>   | Unknown                                      | Spain                                  |
| <b>NRBC 101999</b> | Decaying leaf of <i>Rhizophora mucronata</i> | Japan                                  |
| <b>CBS 5828</b>    | Soil                                         | Denmark                                |
| <b>dd281a</b>      | Forest                                       | Germany, Heidelberg                    |
| <b>CBS 2861</b>    | Soil                                         | Sweden                                 |
| <b>CBS 4568</b>    | Soil                                         | Sweden                                 |
| <b>DBVPG 3452</b>  | Soil                                         | Sweden, Ultana                         |
| <b>DBVPG 3108</b>  | Soil                                         | Netherlands                            |

**Table S2.** Conditions used in this study. The classification “Carbon utilization” indicates that the 2% of dextrose was substituted by other carbon sources.

| <b>Condition</b>        | <b>Concentration</b> | <b>Class</b>  |
|-------------------------|----------------------|---------------|
| <b>Acetate</b>          | 2 %                  | Carbon source |
| <b>Ethanol</b>          | 2 %                  | Carbon source |
| <b>Ethanol</b>          | 5 %                  | Carbon source |
| <b>Galactose</b>        | 2 %                  | Carbon source |
| <b>Glucose</b>          | 2 %                  | Carbon source |
| <b>Glycerol</b>         | 2 %                  | Carbon source |
| <b>Mannitol</b>         | 2 %                  | Carbon source |
| <b>Raffinose</b>        | 2 %                  | Carbon source |
| <b>Sorbitol</b>         | 2 %                  | Carbon source |
| <b>Succinate</b>        | 2 %                  | Carbon source |
| <b>Sucrose</b>          | 2 %                  | Carbon source |
| <b>Xylose</b>           | 2 %                  | Carbon source |
| <b>CaCl<sub>2</sub></b> | 600 mM               | Environment   |
| <b>CaCl<sub>2</sub></b> | 100 mM               | Environment   |
| <b>Cold</b>             | 23 °C                | Environment   |
| <b>CoSO<sub>4</sub></b> | 0.1 mM               | Environment   |
| <b>CoSO<sub>4</sub></b> | 0.05 mM              | Environment   |
| <b>CuSO<sub>4</sub></b> | 7.5 mM               | Environment   |
| <b>CuSO<sub>4</sub></b> | 5 mM                 | Environment   |
| <b>Ethanol</b>          | 10 %                 | Environment   |
| <b>Ethanol</b>          | 5 %                  | Environment   |
| <b>Heat</b>             | 40 °C                | Environment   |
| <b>Heat</b>             | 37 °C                | Environment   |
| <b>Heat</b>             | 38 °C                | Environment   |
| <b>LiCl</b>             | 5 mM                 | Environment   |
| <b>LiCl</b>             | 1 mM                 | Environment   |
| <b>Methanol</b>         | 8 %                  | Environment   |
| <b>Methanol</b>         | 5 %                  | Environment   |
| <b>NaCl</b>             | 1 M                  | Environment   |
| <b>NaCl</b>             | 0.5 M                | Environment   |
| <b>NaCl</b>             | 0.75 M               | Environment   |
| <b>NiSO<sub>4</sub></b> | 10 mM                | Environment   |
| <b>YNB</b>              |                      | Environment   |
| <b>5-FU</b>             | 10 <sup>-4</sup> M   | Toxins        |
| <b>5-FU</b>             | 10 <sup>-6</sup> M   | Toxins        |
| <b>6-azauracil</b>      | 1250 mg/ml           | Toxins        |
| <b>6-azauracil</b>      | 500 mg/ml            | Toxins        |
| <b>Arsenic</b>          | 0.5 mM               | Toxins        |
| <b>Arsenic</b>          | 0.05 mM              | Toxins        |
| <b>B-</b>               | 10 mM                | Toxins        |



|                        |                     |        |
|------------------------|---------------------|--------|
| <b>mercaptoethanol</b> |                     |        |
| <b>Caffein</b>         | 2.25 mg/ml          | Toxins |
| <b>Caffein</b>         | 1.5 mg/ml           | Toxins |
| <b>Cycloheximide</b>   | $10^{-5}$ M         | Toxins |
| <b>Cycloheximide</b>   | $10^{-6}$ M         | Toxins |
| <b>DMSO</b>            | 8 %                 | Toxins |
| <b>DMSO</b>            | 6 %                 | Toxins |
| <b>DMSO</b>            | 4 %                 | Toxins |
| <b>DTT</b>             | 1.4 mM              | Toxins |
| <b>Nystatin</b>        | $10^{-6}$ M         | Toxins |
| <b>Nystatin</b>        | $5 \cdot 10^{-7}$ M | Toxins |
| <b>Rapamycin</b>       | $10^{-7}$ M         | Toxins |
| <b>Rapamycin</b>       | $10^{-8}$ M         | Toxins |
| <b>SDS</b>             | 0.03 %              | Toxins |
| <b>SDS</b>             | 0.01 %              | Toxins |
| <b>SDS</b>             | 0.003 %             | Toxins |
