# Supplementary material for: Large-Scale Survey of Intraspecific Fitness and Cell Morphology Variation in a Protoploid Yeast Species
Source: PubMed Central journal article supplement (PMC4825641; doi:10.1534/g3.115.026682), 2016-02-16

**Figure S1**

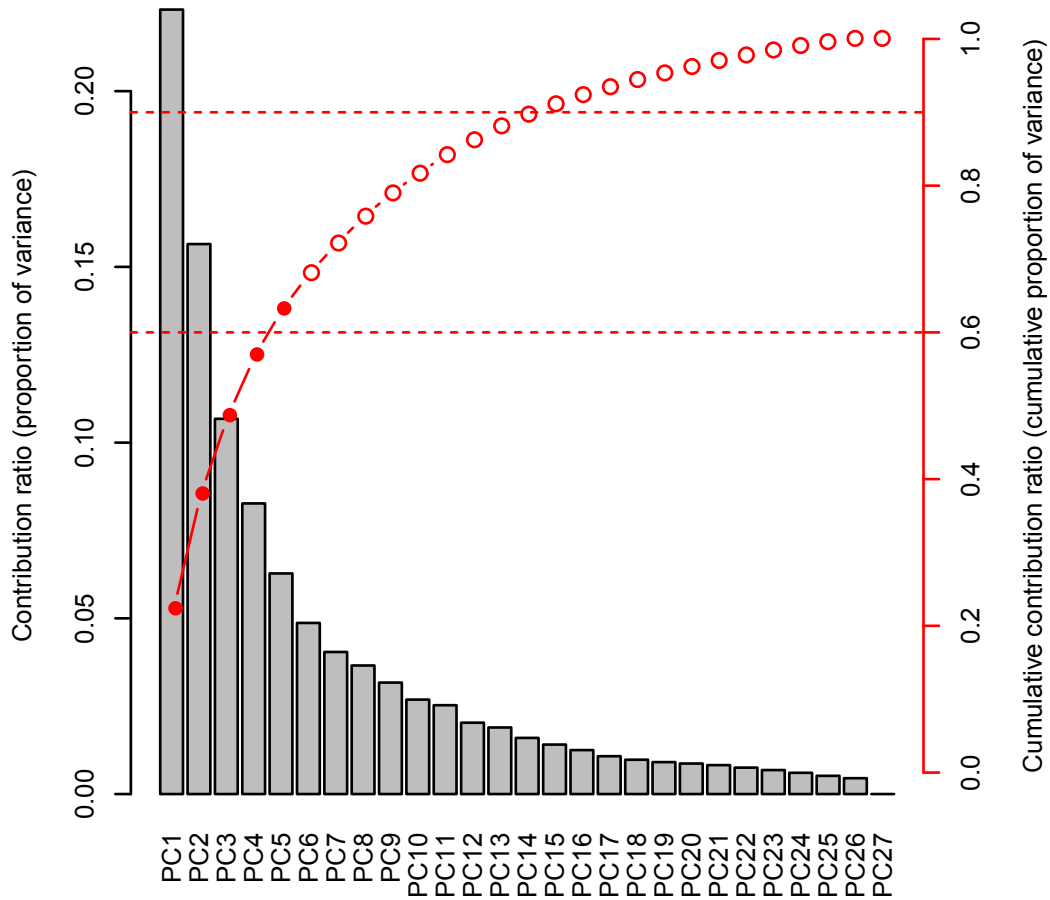

Supplement: supp_g3.115.026682_FigureS1.pdf [file supp_g3.115.026682_FigureS1.pdf]
