# Supplementary material for: Large-Scale Survey of Intraspecific Fitness and Cell Morphology Variation in a Protoploid Yeast Species
Source: PubMed Central journal article supplement (PMC4825641; doi:10.1534/g3.115.026682), 2016-02-16

Figure S3

### Carbon sources

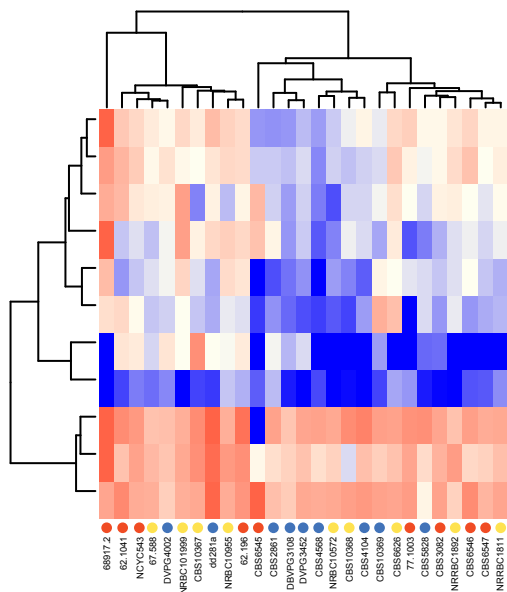

### Environment and Metabolites

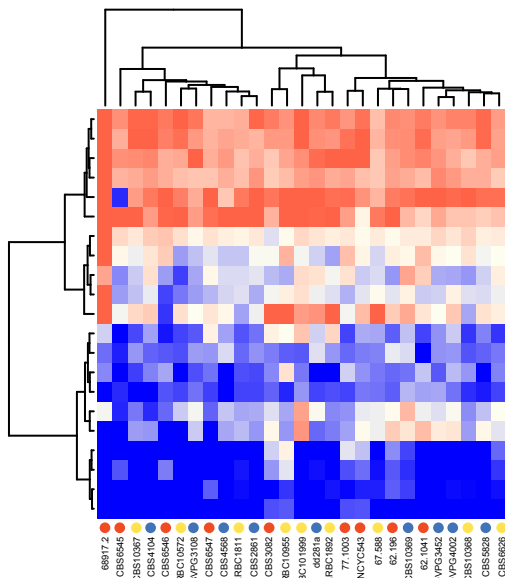

### Toxins

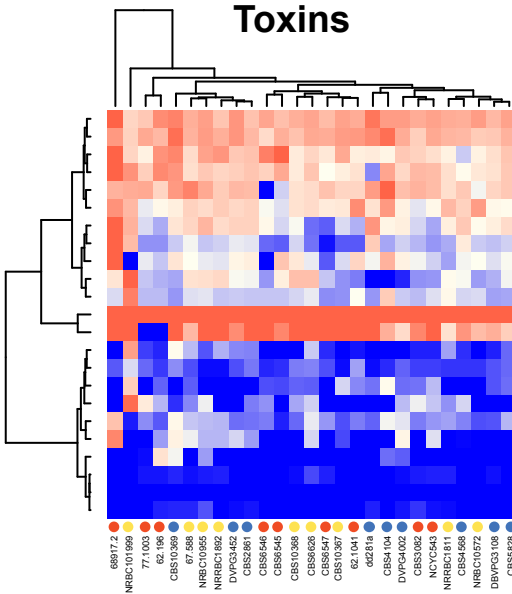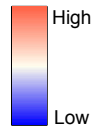

Supplement: supp_g3.115.026682_FigureS3.pdf [file supp_g3.115.026682_FigureS3.pdf]
