# Supplementary material for: Large-Scale Survey of Intraspecific Fitness and Cell Morphology Variation in a Protoploid Yeast Species
Source: PubMed Central journal article supplement (PMC4825641; doi:10.1534/g3.115.026682), 2016-02-16
Supplement: supp_g3.115.026682_TableS1.pdf [file supp_g3.115.026682_TableS1.pdf]

**Table S1.** Strains used in this study

| <b>Strain</b>      | <b>Ecological niches</b>                     | <b>Geographical origins</b>            |
|--------------------|----------------------------------------------|----------------------------------------|
| <b>62-1041</b>     | Willow exudate                               | USA, California, Davis                 |
| <b>CBS 3082</b>    | <i>Drosophila pinicola</i>                   | USA, California                        |
| <b>77-1003</b>     | Unknown                                      | USA, California                        |
| <b>NCYC 543</b>    | <i>Drosophila pinicola</i>                   | USA, California                        |
| <b>62-196</b>      | <i>Taraxacum officinale</i>                  | Canada, Saskatoon                      |
| <b>CBS 6545</b>    | Salix exudate                                | USA, California                        |
| <b>CBS 6546</b>    | Exudate of Populus sp.                       | USA, California                        |
| <b>CBS 6547</b>    | <i>Drosophila pseudobscura</i>               | USA, California, Gualala Creek         |
| <b>CBS 6626</b>    | Exudate of tree                              | Japan, Mt. Takamatsu                   |
| <b>NRBC 1892</b>   | Tree exudate                                 | Japan                                  |
| <b>CBS 10367</b>   | <i>Quercus Mongolica</i> exudate             | Russia, Kedrova pas natural reserve    |
| <b>CBS 10368</b>   | <i>Quercus Mongolica</i> exudate             | Russia, Sikhote-Alinsky nature reserve |
| <b>CBS 4104</b>    | Soil                                         | Netherlands, Wageningen                |
| <b>68.917-2</b>    | Exudate of Populus trichocarpa               | Canada                                 |
| <b>DBVPG 4002</b>  | Cavern                                       | Italy                                  |
| <b>67-588</b>      | <i>Ulmus japonica</i> exudate                | Japan, Yamabe                          |
| <b>NRBC 1811</b>   | Partially decaying leaf                      | Japan                                  |
| <b>NRBC 10572</b>  | Moss                                         | Thailand                               |
| <b>NRBC 10955</b>  | Decaying leaf of <i>Rhizophora mucronata</i> | Japan                                  |
| <b>CBS 10369</b>   | Unknown                                      | Spain                                  |
| <b>NRBC 101999</b> | Decaying leaf of <i>Rhizophora mucronata</i> | Japan                                  |
| <b>CBS 5828</b>    | Soil                                         | Denmark                                |
| <b>dd281a</b>      | Forest                                       | Germany, Heidelberg                    |
| <b>CBS 2861</b>    | Soil                                         | Sweden                                 |
| <b>CBS 4568</b>    | Soil                                         | Sweden                                 |
| <b>DBVPG 3452</b>  | Soil                                         | Sweden, Ultana                         |
| <b>DBVPG 3108</b>  | Soil                                         | Netherlands                            |
