# Supplementary material for: Large-Scale Survey of Intraspecific Fitness and Cell Morphology Variation in a Protoploid Yeast Species
Source: PubMed Central journal article supplement (PMC4825641; doi:10.1534/g3.115.026682), 2016-02-16
Supplement: supp_g3.115.026682_TableS2.pdf [file supp_g3.115.026682_TableS2.pdf]

**Table S2.** Conditions used in this study. The classification “Carbon utilization” indicates that the 2% of dextrose was substituted by other carbon sources.

| <b>Condition</b>        | <b>Concentration</b> | <b>Class</b>  |
|-------------------------|----------------------|---------------|
| <b>Acetate</b>          | 2 %                  | Carbon source |
| <b>Ethanol</b>          | 2 %                  | Carbon source |
| <b>Ethanol</b>          | 5 %                  | Carbon source |
| <b>Galactose</b>        | 2 %                  | Carbon source |
| <b>Glucose</b>          | 2 %                  | Carbon source |
| <b>Glycerol</b>         | 2 %                  | Carbon source |
| <b>Mannitol</b>         | 2 %                  | Carbon source |
| <b>Raffinose</b>        | 2 %                  | Carbon source |
| <b>Sorbitol</b>         | 2 %                  | Carbon source |
| <b>Succinate</b>        | 2 %                  | Carbon source |
| <b>Sucrose</b>          | 2 %                  | Carbon source |
| <b>Xylose</b>           | 2 %                  | Carbon source |
| <b>CaCl<sub>2</sub></b> | 600 mM               | Environment   |
| <b>CaCl<sub>2</sub></b> | 100 mM               | Environment   |
| <b>Cold</b>             | 23 °C                | Environment   |
| <b>CoSO<sub>4</sub></b> | 0.1 mM               | Environment   |
| <b>CoSO<sub>4</sub></b> | 0.05 mM              | Environment   |
| <b>CuSO<sub>4</sub></b> | 7.5 mM               | Environment   |
| <b>CuSO<sub>4</sub></b> | 5 mM                 | Environment   |
| <b>Ethanol</b>          | 10 %                 | Environment   |
| <b>Ethanol</b>          | 5 %                  | Environment   |
| <b>Heat</b>             | 40 °C                | Environment   |
| <b>Heat</b>             | 37 °C                | Environment   |
| <b>Heat</b>             | 38 °C                | Environment   |
| <b>LiCl</b>             | 5 mM                 | Environment   |
| <b>LiCl</b>             | 1 mM                 | Environment   |
| <b>Methanol</b>         | 8 %                  | Environment   |
| <b>Methanol</b>         | 5 %                  | Environment   |
| <b>NaCl</b>             | 1 M                  | Environment   |
| <b>NaCl</b>             | 0.5 M                | Environment   |
| <b>NaCl</b>             | 0.75 M               | Environment   |
| <b>NiSO<sub>4</sub></b> | 10 mM                | Environment   |
| <b>YNB</b>              |                      | Environment   |
| <b>5-FU</b>             | 10 <sup>-4</sup> M   | Toxins        |
| <b>5-FU</b>             | 10 <sup>-6</sup> M   | Toxins        |
| <b>6-azauracil</b>      | 1250 mg/ml           | Toxins        |
| <b>6-azauracil</b>      | 500 mg/ml            | Toxins        |
| <b>Arsenic</b>          | 0.5 mM               | Toxins        |
| <b>Arsenic</b>          | 0.05 mM              | Toxins        |
| <b>B-</b>               | 10 mM                | Toxins        |

|                        |                     |        |
|------------------------|---------------------|--------|
| <b>mercaptoethanol</b> |                     |        |
| <b>Caffein</b>         | 2.25 mg/ml          | Toxins |
| <b>Caffein</b>         | 1.5 mg/ml           | Toxins |
| <b>Cycloheximide</b>   | $10^{-5}$ M         | Toxins |
| <b>Cycloheximide</b>   | $10^{-6}$ M         | Toxins |
| <b>DMSO</b>            | 8 %                 | Toxins |
| <b>DMSO</b>            | 6 %                 | Toxins |
| <b>DMSO</b>            | 4 %                 | Toxins |
| <b>DTT</b>             | 1.4 mM              | Toxins |
| <b>Nystatin</b>        | $10^{-6}$ M         | Toxins |
| <b>Nystatin</b>        | $5 \cdot 10^{-7}$ M | Toxins |
| <b>Rapamycin</b>       | $10^{-7}$ M         | Toxins |
| <b>Rapamycin</b>       | $10^{-8}$ M         | Toxins |
| <b>SDS</b>             | 0.03 %              | Toxins |
| <b>SDS</b>             | 0.01 %              | Toxins |
| <b>SDS</b>             | 0.003 %             | Toxins |
